# Supplementary material for: Deciphering structural evolution of adsorbed ˙OH species on Zr-oxo nodes of UiO-66 to modulate methane hydroxylation
Source: Royal Society of Chemistry journal article supplement (doi:10.1039/d3ta05851d), 2023-12-29
Supplement: d3ta05851d2.pdf [file d3ta05851d2.pdf]

## Supporting Information

### Deciphering Structure Evolution of Adsorbed $\cdot\text{OH}$ Species on Zr-oxo Nodes of UiO-66 to Modulate Methane Hydroxylation

Ling-Chan Tian,<sup>[a]†</sup> Geqian Fang,<sup>[b,c]†</sup> Yun Zhou,<sup>[a]</sup> Wenjun Yu,<sup>[b,c]</sup> Lin Li,<sup>[b]</sup> Jin-Nian Hu,<sup>[a]</sup>

Hai-Yan Wang,<sup>[a]</sup> Jin-Xia Liang,<sup>\*[a]</sup> Chun Zhu,<sup>\*[a]</sup> Xiaodong Wang<sup>[b]</sup> and Jian Lin<sup>\*[b]</sup>

<sup>[a]</sup> School of Chemistry and Chemical Engineering, Guizhou University, Guiyang, 550025, China.

<sup>[b]</sup> CAS Key Laboratory of Science and Technology on Applied Catalysis, Dalian Institute of Chemical Physics, Chinese Academy of Sciences, Dalian 116023, P. R. China.

<sup>[c]</sup> University of Chinese Academy of Sciences, Beijing 100049, P. R. China.

[†] These authors contributed equally to this work.

\*Corresponding authors: liangjx2009@163.com; czhu2014@163.com;  
jianlin@dicp.ac.cn.

## 1. The reaction rate constant and free energy correlation

The reaction rate constant of CH<sub>4</sub> on different catalysts is calculated by the Eyring-Polanyi equation based on the transition state theory (TST), which can be written as an equation (1):

$$k^{TST} = \sigma \frac{k_B T}{h} \left( \frac{RT}{P_0} \right)^{\Delta n} e^{-\Delta G^{0, \ddagger} / (k_B T)} \quad (1)$$

where:  $\sigma$  is the transmission coefficient;

$k_B$  is Boltzmann's constant;

T is the absolute temperature;

h is the Planck's constant;

R is the gas constant;

P<sub>0</sub> is the standard atmospheric pressure;

And  $-\Delta G^{0, \ddagger}$  is the free energy of activation, where:

$$-\Delta G^{0, \ddagger}(T) = \Delta G_{TS}^0(T) - \Delta G_{Reactant}^0(T) \quad (2)$$

We first calculate the free energy of activation. The vibrational partition function is written as Eq. (3):

$$q_{vib} = \prod_i \frac{1}{1 - e^{-\frac{\epsilon_i}{k_B T}}} \quad (3)$$

Where,  $\epsilon^i$  is the vibrational energies.

The internal energy is written as:

$$U_{vib} = \sum_i \frac{\epsilon_i}{e^{\frac{\epsilon_i}{k_B T}} - 1} \quad (4)$$

And the entropy, S, is calculated via:

$$S_{vib} = k_B \sum_i \frac{\epsilon_i}{e^{\frac{\epsilon_i}{k_B T}} - 1} - \ln \left( 1 - e^{-\frac{\epsilon_i}{k_B T}} \right) \quad (5)$$

Since the zero-point vibrational energy (ZPVE) has already been considered in the reaction energy profiles, the thermal correction to  $\Delta G(T)$  in the present work at 298.15 K and P = 1atm is defined as Eq. (6):

$$G_{corr}(298.15 K) = U_{vib}(298.15 K) + 298.15 * S_{vib}(298.15 K) \quad (6)$$

By using the VASPkit processing tool <sup>1</sup>, several activation free energies  $-\Delta G^{0, \ddagger}$  are calculated, and then the related reaction rate constants are calculated.

## 2. The electron density difference

The differential electron densities can be used to explain the change of the charge densities during the chemical reaction or when the molecule binds to the surface. And the changes of electron distribution during the formation of chemical bonds are given by formula (7):

$$\Delta\rho = \rho_{AB} - (\rho_A + \rho_B) \quad (7)$$

Where  $\rho_{AB}$  is the electron density of the total system, and  $\rho_A$  and  $\rho_B$  are the undisturbed electron densities of adsorbed substances and substrates, respectively.

### 3. Catalytic performance evaluation

Catalyst testing for the oxidation of methane with  $H_2O_2$  was carried out in a 50 mL stainless-steel autoclave containing a Teflon liner vessel with a total volume of 38 mL. The vessel was charged with 10 mg catalyst, 20 mL dilute  $H_2O_2$  solution (0.25 M). After sealing, the reactor was flushed with 5 bar methane for 5 times to remove the contaminant gasses and then charged to 3 MPa methane. The autoclave was heated to 50 °C with vigorous stirring at 1200 rpm. The reactions were carried out for 30 min, after which the vessel was cooled in ice-water bath to minimize the volatility of products. The resultant solution after filtration was analyzed by Nuclear magnetic resonance (NMR) spectroscopy, which were acquired on Bruker AVANCE III HD 700 MHz spectrometer equipped with pulsed field gradient probes. The amount of  $CH_3OOH$ ,  $HOCH_2OOH$  was obtained with the same equation of  $CH_3OH$ . Usually, 0.6 mL collected filtrate and 0.1 mL of  $D_2O$  (with 0.02 wt% versus 3-(trimethylsilyl)-1-propanesulfonic acid sodium salt (DSS) as internal standard) were mixed in an NMR tube for analysis. During NMR measurements, a solvent suppression program was run in order to minimize the signal originated from  $H_2O$ . The gaseous products were analyzed by Agilent 7890B gas chromatograph (GC) system with a thermal conductivity detector (TCD) and flame ionization detector (FID) and a nickel (Ni) catalyst convertor that could quantitatively transform the carbon oxides into methane. This system contains Porapak Q columns for the separation of gaseous

products. The oxygenates selectivity (%), oxygenates yields ( $\mu\text{mol g}_{\text{cat}}^{-1} \text{ h}^{-1}$ ) were calculated by the following equations (8-9):

$$\text{Oxygenates selectivity} = \frac{n_{(\text{oxygenates products})}}{n_{(\text{total products})}} \times 100\% \quad (8)$$

$$\text{Oxygenates yields} = \frac{n_{(\text{oxygenates products})}}{m_{\text{cat.}} \times t} \quad (9)$$

#### 4. Catalyst characterizations

X-ray diffraction (XRD) data were collected on a X'pert Pro-1 (PANalytical) diffractometer with a copper anode ( $\text{Cu K}\alpha$ ,  $\lambda = 1.5432 \text{ \AA}$ ), operating at 40 kV and 40 mA with a scanning angel (2-theta) from  $5^\circ$  to  $50^\circ$ .

The morphology of the MOFs was characterized using a JSM-7800F Scanning electron microscope (SEM) with an accelerating voltage of 30.0 kV.

Electron paramagnetic resonance (EPR) spectroscopic measurements were obtained at room temperature using a Bruker A200 EPR spectrometer operated at X-band frequency with using 5,5-dimethyl-1-pyrroline N-Oxide (DMPO) as spin trapping agent for free radical. The EPR characterization details in our manuscript are as follows: 0.1 mL radical capture agent of DMPO aqueous solution ( $28 \text{ mg mL}^{-1}$ ) was pre-added into a 2 mL brown flask. The reaction solution (0.1 mL) before methane addition and after methane oxidation at  $50 \text{ }^\circ\text{C}$  for 30 min was collected into the brown flask from the vessel and stirred for 1 min to fully capture the free radical species. Then, the mixture was filtered and frozen by liquid  $\text{N}_2$ . These samples were thawed

subsequently for the EPR measurements. The parameters for EPR measurements were as follows: microwave frequency of 9.3 GZ, microwave power of 10 mW, and modulation frequency of 100 kHz.

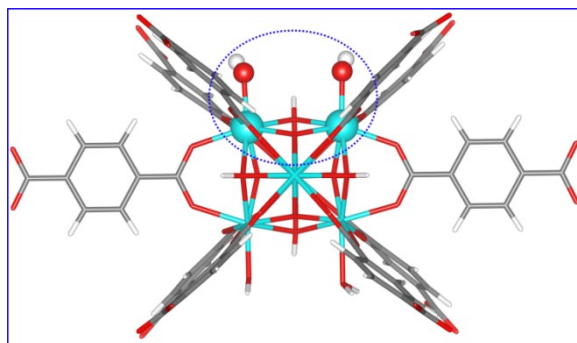

**Fig. S1** Missing-ligand defect of UiO-66-H with two  $Zr_{oxo}(\cdot OH/\cdot OH)$  active centers.

Color scheme: Blue (Zr), red (O), gray (C), white (H).

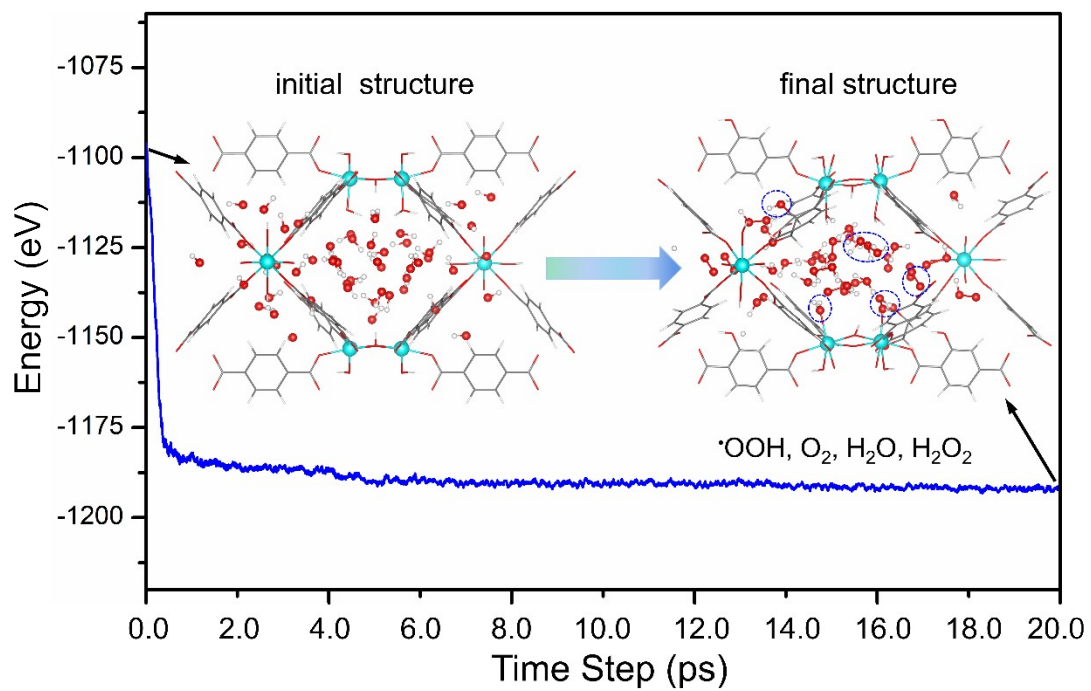

**Fig. S2** The total energy and the initial and the final snapshots of AIMD simulation on the structure evolution of Zr-oxo nodes with high  $\cdot\text{OH}$  concentration at 25°C.

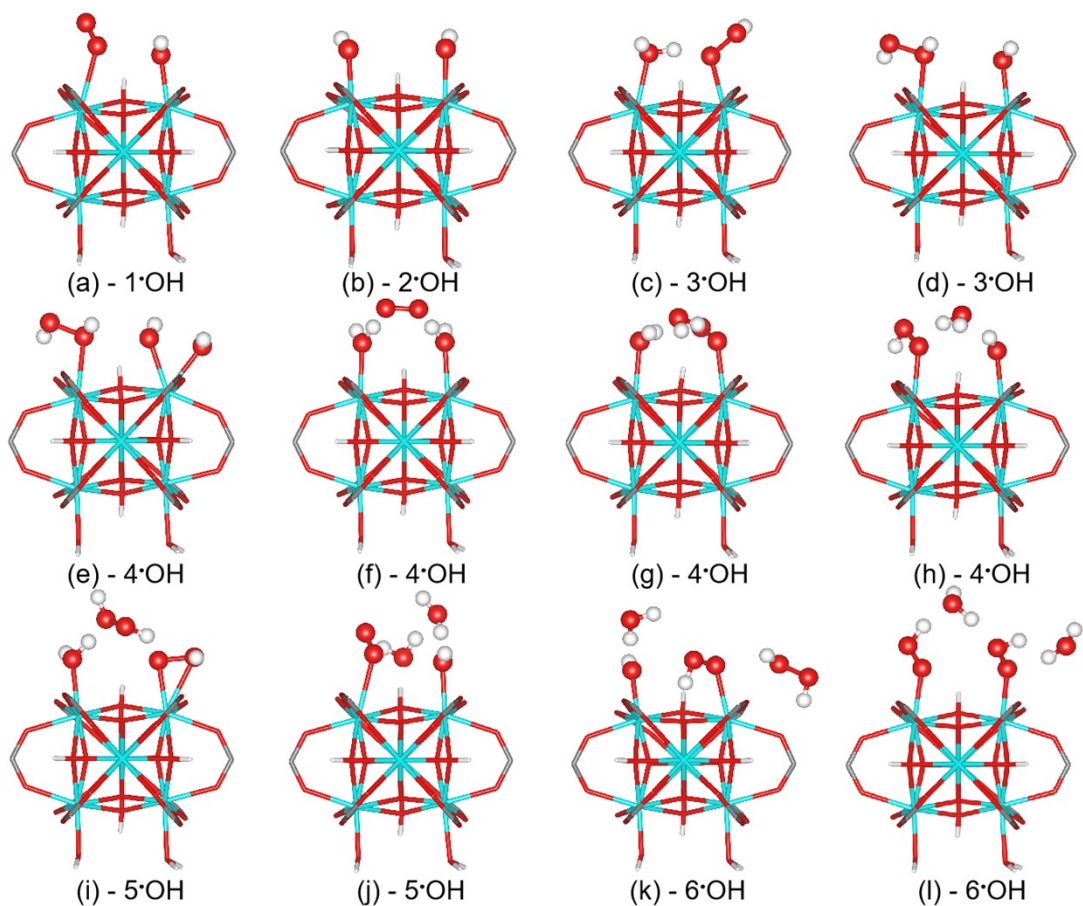

**Fig. S3** In UiO-66-H, the configurations of different active sites corresponding to the increase of  $\cdot\text{OH}$  concentration, (a, b) the geometric structure of  $1\cdot\text{OH}$  and  $2\cdot\text{OH}$ , respectively, (c, d) the geometric structures of  $3\cdot\text{OH}$ , (e–h) corresponding to the geometric structure of  $4\cdot\text{OH}$ , (i, j) the geometric structures of  $5\cdot\text{OH}$ , and (k, l) the geometric structures of  $6\cdot\text{OH}$ . Color scheme: C (gray), H (white), O (red), and Zr (light blue).



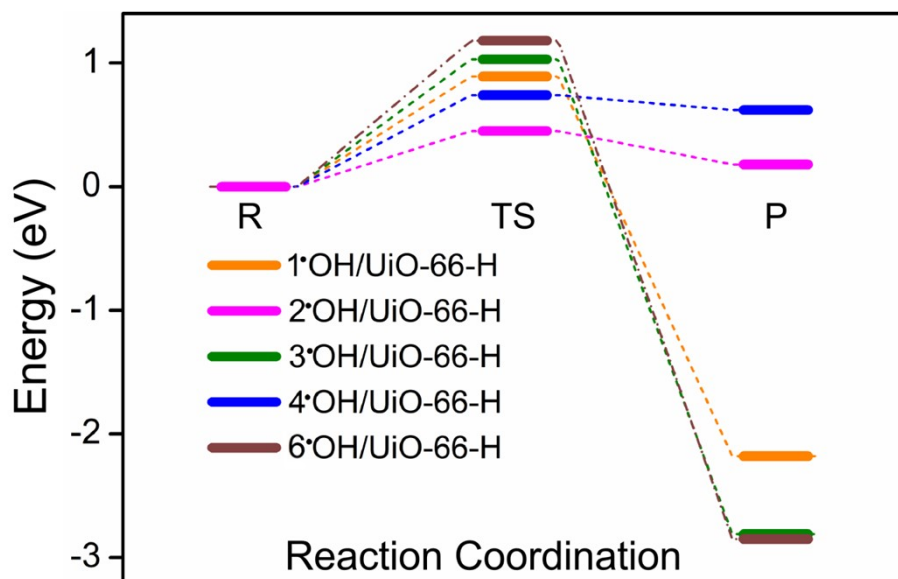

**Fig. S4** The calculated energy barrier of  $\cdot\text{CH}_3$  generated on the Zr-oxo nodes adsorbed by  $\cdot\text{OH}$  or  $\cdot\text{OOH}$  species over UiO-66-H catalysts with increasing  $\cdot\text{OH}$  amount.

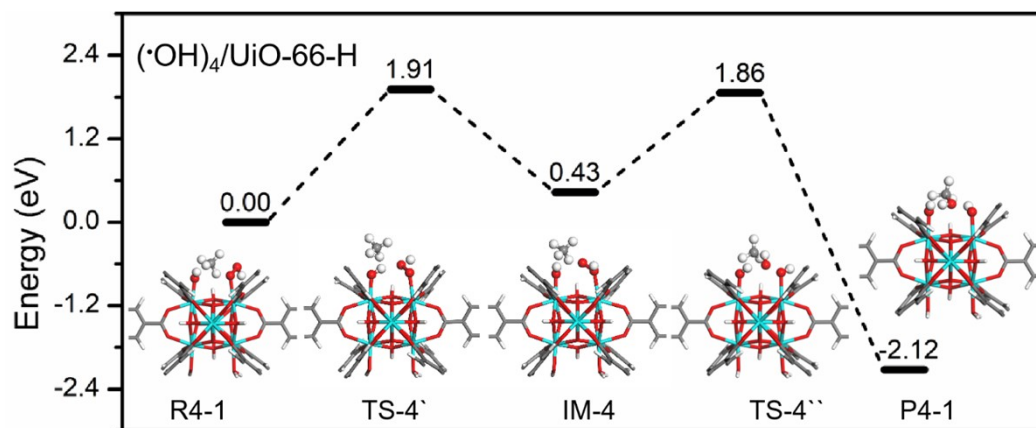

**Fig. S5** The predicted profile of reaction pathway for the DSOM reaction on Zr-•OOH active site of Zr-(•OOH/•OH) in R4.

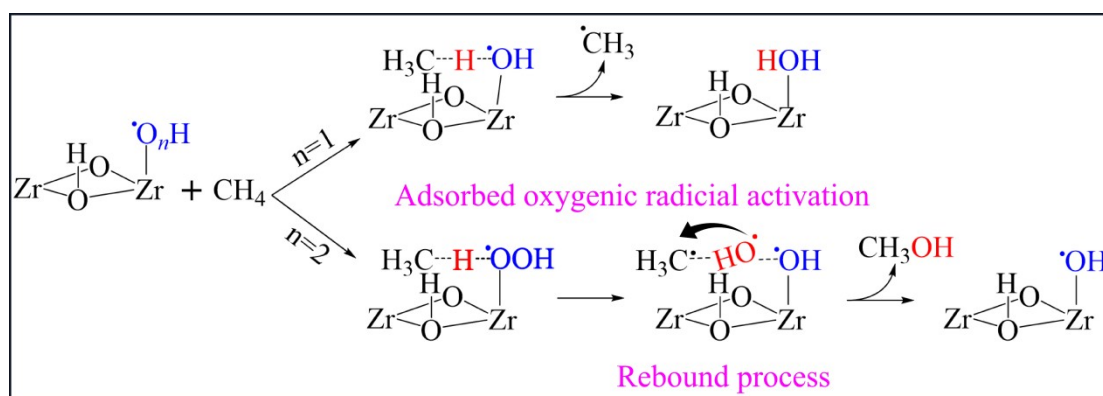

**Fig. S6** Proposed H-atom abstraction/radical methane activation mechanism on Zr-oxo nodes of UiO-66-H catalyst.

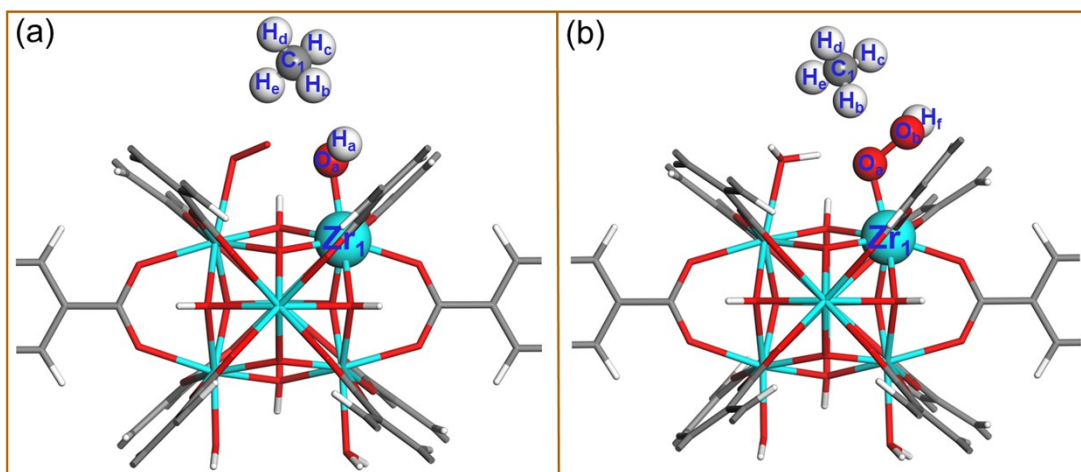

**Fig. S7** The atomic number of CH<sub>4</sub> activation catalyzed by the Zr-oxo nodes, (a) and (b) the activation of CH<sub>4</sub> on the Zr-oxo nodes adsorbed with <sup>•</sup>O<sub>a</sub>H<sub>a</sub> and <sup>•</sup>O<sub>a</sub>O<sub>b</sub>H<sub>f</sub> species, respectively. Color scheme: C (gray), H (white), O (red), and Zr (light blue). <sup>•</sup>O<sub>a</sub>H<sub>a</sub> or <sup>•</sup>O<sub>a</sub>O<sub>b</sub>H<sub>f</sub> are adsorbed on Zr atom. H<sub>b</sub> is the atom transferred from CH<sub>4</sub> to <sup>•</sup>O<sub>a</sub>H<sub>a</sub><sup>\*</sup> or <sup>•</sup>O<sub>a</sub>O<sub>b</sub>H<sub>f</sub><sup>\*</sup>.

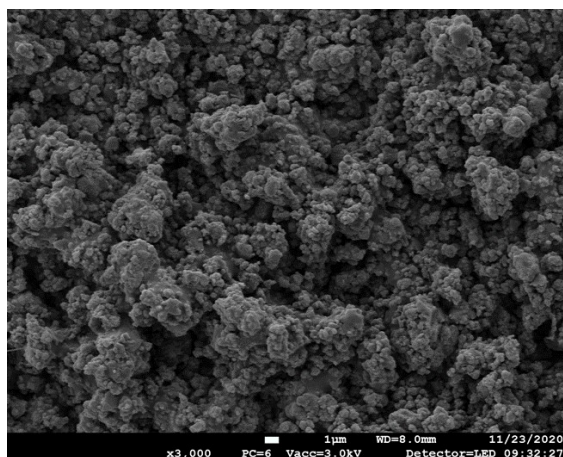

**Fig. S8** Representative SEM image of UiO-66-H.

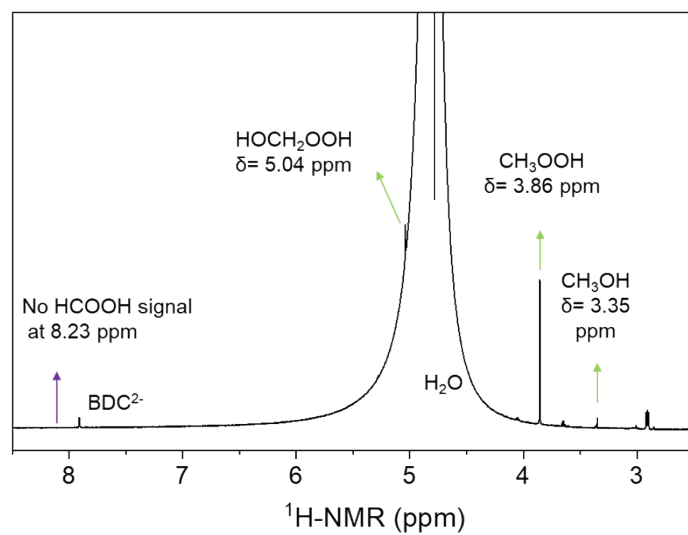

**Fig. S9** The  $^1\text{H-NMR}$  spectrum for the oxygenates produced on UiO-66-H.

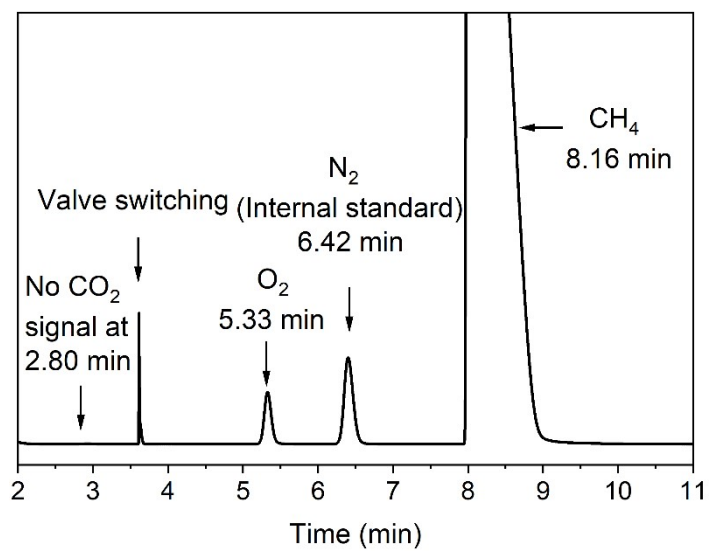

**Fig. S10** The TCD spectra for gaseous products over UiO-66-H.

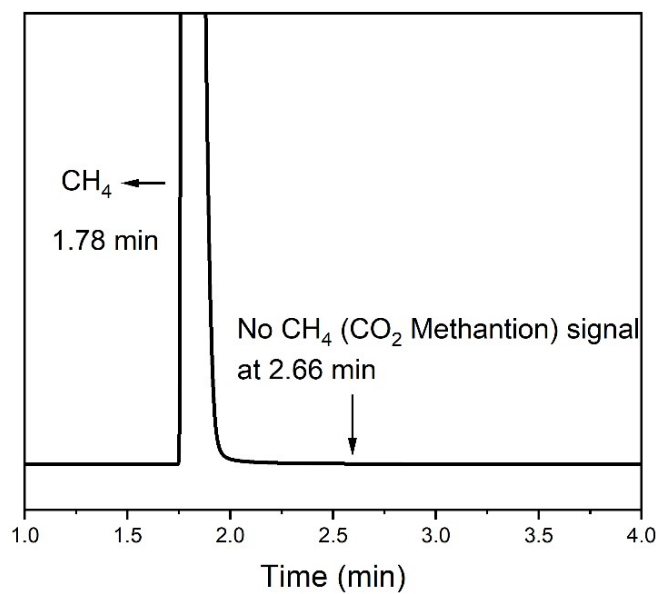

**Fig. S11** The FID spectra for gaseous products over UiO-66-H.



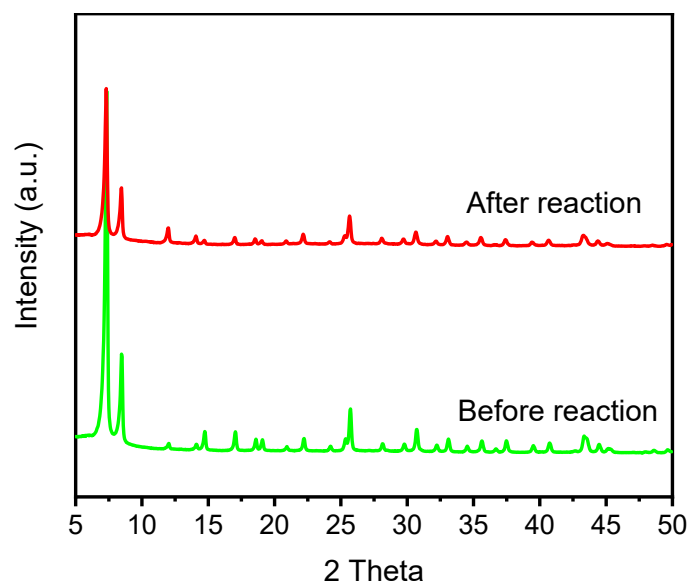

**Fig. S12** XRD patterns of UiO-66-H catalysts before and after reaction.

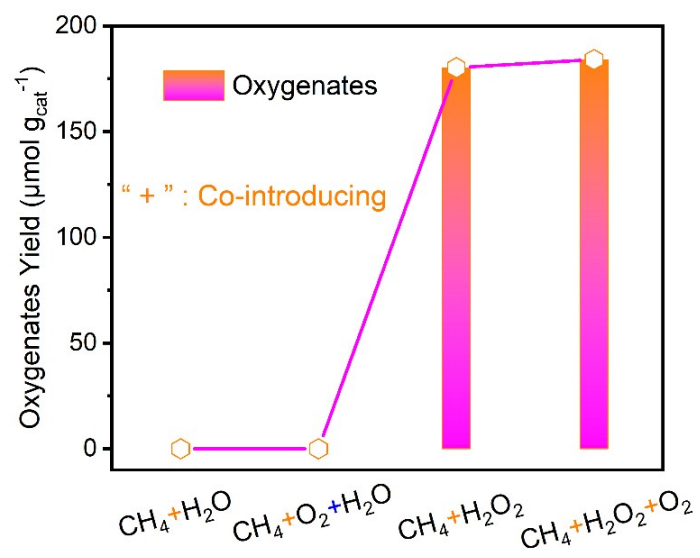

**Fig. S13** The controlled experiments by using different reactants ( $\text{O}_2$ ,  $\text{H}_2\text{O}_2$  and  $\text{CH}_4$ ).

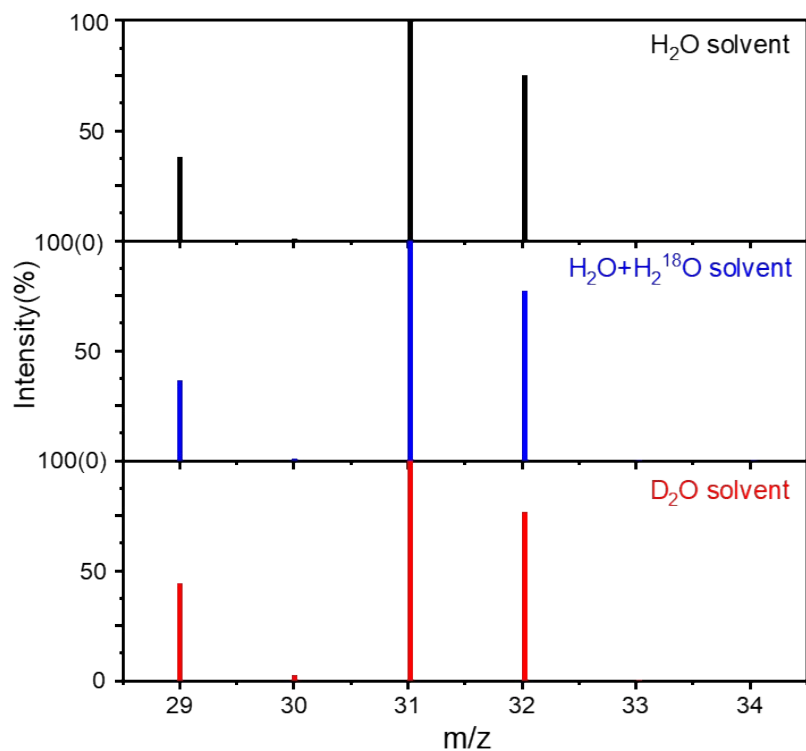

**Fig. S14** The GC/Q-TOF-MS spectra from CH<sub>4</sub> oxidation using H<sub>2</sub>O, D<sub>2</sub>O or H<sub>2</sub>O + H<sub>2</sub><sup>18</sup>O as solvent over UiO-66-H. Test conditions: Pressure (CH<sub>4</sub>) = 3 MPa, Catalyst: 10 mg UiO-66-H, 0.25 M H<sub>2</sub>O<sub>2</sub> (H<sub>2</sub>O, D<sub>2</sub>O or H<sub>2</sub>O + H<sub>2</sub><sup>18</sup>O solvent), 50 °C (ramp rate of 2 °C min<sup>-1</sup>), reaction for 4 h. CH<sub>3</sub>OOH and HOCH<sub>2</sub>OOH could degrade to CH<sub>3</sub>OH at high injection temperature of GC.<sup>2-4</sup>

**Table S1** The calculated relative energies of the structures in Fig. S3, the (c-l) are consistent with the sequence number corresponding to the structures of Fig. S3.

| The number of<br>•OH* | UiO-66-H (eV) |           |           |           |
|-----------------------|---------------|-----------|-----------|-----------|
| 1                     | 0.0 (a)       | --        | --        | --        |
| 2                     | 0.0 (b)       | --        | --        | --        |
| 3                     | 0.00 (c)      | 0.59 (d)  | --        | --        |
| 4                     | 0.00 (e)      | -2.02 (f) | -2.17 (g) | -1.28 (h) |
| 5                     | 0.00 (i)      | -0.47 (j) | --        | --        |
| 6                     | 0.00 (k)      | -0.45 (l) | --        | --        |

“\*” represents the adsorption state.

**Table S2** Self-reaction processes of the different amount •OH species adsorbed on Zr-oxo nodes of UiO-66-H.

| •OH* number | Self-reactions                                                                                                                                                                                                                                                                                                                            | Products                                                                            |
|-------------|-------------------------------------------------------------------------------------------------------------------------------------------------------------------------------------------------------------------------------------------------------------------------------------------------------------------------------------------|-------------------------------------------------------------------------------------|
| 3           | $3\bullet\text{OH} \rightarrow \text{H}_2\text{O}^* + \bullet\text{OOH}^*$<br>$3\bullet\text{OH} \rightarrow \text{H}_2\text{O}_2^* + \bullet\text{OH}^*$                                                                                                                                                                                 | 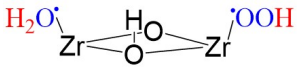 |
| 4           | $4\bullet\text{OH} \rightarrow \text{H}_2\text{O}_2^* + 2\bullet\text{OH}^*$<br>$4\bullet\text{OH} \rightarrow \text{H}_2\text{O}^* + \text{O}_2^* + \text{O}_2$<br>$4\bullet\text{OH} \rightarrow 2\text{H}_2\text{O}^* + \text{O}_2^*$<br>$4\bullet\text{OH} \rightarrow \bullet\text{OOH}^* + \bullet\text{OH}^* + \text{H}_2\text{O}$ |  |
| 5           | $5\bullet\text{OH} \rightarrow \text{O}_2^* + \bullet\text{OH}^* + 2\text{H}_2\text{O}$<br>$5\bullet\text{OH} \rightarrow \text{H}_2\text{O}^* + \bullet\text{OOH}^* + \text{H}_2\text{O}_2$                                                                                                                                              |  |
| 6           | $6\bullet\text{OH} \rightarrow 2\bullet\text{OOH}^* + 2\text{H}_2\text{O}^*$<br>$6\bullet\text{OH} \rightarrow \text{OH}^* + \bullet\text{OOH}^* + \text{H}_2\text{O} + \text{H}_2\text{O}_2$                                                                                                                                             |  |

**Table S3** The calculated energy barrier of  $\cdot\text{CH}_3$  generated on the Zr-oxo nodes adsorbed by  $\cdot\text{OH}$  or  $\cdot\text{OOH}$  species over UiO-66-H catalysts. Reactants (R), transition states (TS), products (P).

| Added $\cdot\text{OH}$               | UiO-66-H (eV) |      |      |                    |                     |
|--------------------------------------|---------------|------|------|--------------------|---------------------|
|                                      | R             | TS`  | TS`` | TS` <sup>[a]</sup> | TS`` <sup>[a]</sup> |
| $(\cdot\text{OH})_1/\text{UiO-66-H}$ | 0.00          | 0.89 | --   | 0.87               | --                  |
| $(\cdot\text{OH})_2/\text{UiO-66-H}$ | 0.00          | 0.45 | --   | 0.41               | --                  |
| $(\cdot\text{OH})_3/\text{UiO-66-H}$ | 0.00          | 1.18 | 1.03 | 1.34               | 1.13                |
| $(\cdot\text{OH})_4/\text{UiO-66-H}$ | 0.00          | 0.74 | --   | 0.71               | 0.71                |
| $(\cdot\text{OH})_6/\text{UiO-66-H}$ | 0.00          | 1.74 | 1.76 | 1.69               | 1.65                |

<sup>[a]</sup> H<sub>2</sub>O solvation effect

**Table S4** Bader charges ( $|e|$ ) of the selected H, C, O and Zr atoms of the active center in UiO-66-H catalysts with increasing  $\cdot\text{OH}$  concentration.

| Bader charges( $ e $ )                  | $(\cdot\text{OH})_1/\text{UiO-66-H}$ |       |       | $(\cdot\text{OH})_2\text{UiO-66-H}$ |       |       | $(\cdot\text{OH})_3/\text{UiO-66-H}$ |       |       |
|-----------------------------------------|--------------------------------------|-------|-------|-------------------------------------|-------|-------|--------------------------------------|-------|-------|
|                                         | R1                                   | TS1   | P1    | R2                                  | TS2   | P2    | R3                                   | TS3   | P3    |
| H <sub>a</sub>                          | 0.60                                 | 0.60  | 0.61  | 0.59                                | 0.67  | 0.70  | --                                   | --    | --    |
| H <sub>b</sub>                          | 0.04                                 | 0.36  | 0.66  | 0.09                                | 0.33  | 0.58  | 0.04                                 | 0.34  | 0.66  |
| H <sub>c</sub>                          | 0.00                                 | 0.05  | 0.03  | 0.01                                | 0.06  | 0.12  | 0.00                                 | 0.08  | 0.03  |
| H <sub>d</sub>                          | 0.03                                 | 0.06  | 0.04  | 0.03                                | 0.08  | 0.22  | 0.05                                 | 0.10  | 0.02  |
| H <sub>e</sub>                          | 0.02                                 | 0.00  | 0.06  | 0.01                                | 0.16  | 0.08  | 0.05                                 | 0.09  | 0.09  |
| H <sub>f</sub>                          | --                                   | --    | --    | --                                  | --    | --    | 0.64                                 | 0.61  | 0.66  |
| C <sub>1</sub>                          | -0.09                                | -0.17 | 0.43  | -0.15                               | -0.31 | -0.37 | -0.15                                | -0.18 | 0.40  |
| O <sub>a</sub>                          | -0.98                                | -1.18 | -1.27 | -1.18                               | -1.13 | -1.30 | -0.67                                | -0.72 | -1.20 |
| O <sub>b</sub>                          | --                                   | --    | --    | --                                  | --    | --    | -0.69                                | -1.01 | -1.34 |
| Zr <sub>1</sub>                         | 2.78                                 | 2.79  | 2.78  | 2.79                                | 2.78  | 2.78  | 2.78                                 | 2.78  | 2.79  |
| $\cdot\text{O}_a\text{H}_a^*$           | -0.38                                | -0.58 | -0.65 | -0.59                               | -0.46 | -0.60 | --                                   | --    | --    |
| $\cdot\text{O}_a\text{O}_b\text{H}_f^*$ | --                                   | --    | --    | --                                  | --    | --    | -0.72                                | -1.12 | -1.88 |

"\*" represents the adsorption state.

**Table S5** Bader charges ( $|e|$ ) of the selected H, C, O and Zr atoms of the active center in UiO-66-H catalysts with increasing  $\cdot\text{OH}$  concentration.

| Bader charges( $ e $ )                  | $(\cdot\text{OH})_4/\text{UiO-66-H}$ |       |       | $(\cdot\text{OH})_6/\text{UiO-66-H}$ |       |       |
|-----------------------------------------|--------------------------------------|-------|-------|--------------------------------------|-------|-------|
|                                         | R4                                   | TS4   | P4    | R5                                   | TS6   | P5    |
| H <sub>a</sub>                          | 0.60                                 | 0.66  | 0.69  | --                                   | --    | --    |
| H <sub>b</sub>                          | 0.08                                 | 0.42  | 0.61  | 0.07                                 | 0.34  | 0.66  |
| H <sub>c</sub>                          | 0.00                                 | 0.05  | 0.01  | 0.06                                 | 0.12  | 0.06  |
| H <sub>d</sub>                          | 0.02                                 | 0.07  | 0.07  | 0.03                                 | 0.12  | 0.07  |
| H <sub>e</sub>                          | 0.01                                 | 0.08  | 0.14  | 0.01                                 | 0.09  | 0.03  |
| H <sub>f</sub>                          | --                                   | --    | --    | 0.69                                 | 0.62  | 0.62  |
| C <sub>1</sub>                          | -0.12                                | -0.29 | -0.25 | -0.17                                | -0.23 | 0.38  |
| O <sub>a</sub>                          | -1.20                                | -1.18 | -1.32 | -0.35                                | -0.61 | -1.14 |
| O <sub>b</sub>                          | --                                   | --    | --    | -0.76                                | -1.00 | -1.29 |
| Zr <sub>1</sub>                         | 2.78                                 | 2.78  | 2.78  | 2.77                                 | 2.78  | 2.79  |
| $\cdot\text{O}_a\text{H}_a^*$           | -0.60                                | -0.52 | -0.63 | --                                   | --    | --    |
| $\cdot\text{O}_a\text{O}_b\text{H}_f^*$ | --                                   | --    | --    | -0.42                                | -0.99 | -1.81 |

“\*” represents the adsorption state.



**Table S6** The predicted reaction rate constant of CH<sub>4</sub> activation on UiO-66-H catalysts with increasing <sup>•</sup>OH concentration.

| <sup>•</sup> OH Amount | rate constant (s mol L <sup>-1</sup> ) |
|------------------------|----------------------------------------|
|                        | UiO-66-H                               |
| 1                      | 6.47×10 <sup>1</sup>                   |
| 2                      | 3.21×10 <sup>9</sup>                   |
| 3                      | 1.19×10 <sup>-1</sup>                  |
| 4                      | 7.11×10 <sup>4</sup>                   |
| 6                      | 4.91×10 <sup>-4</sup>                  |

**Table S7** Performance comparison of UiO-66-H and previously representative catalysts for DSOM reaction using H<sub>2</sub>O<sub>2</sub> as an oxidant.

| Catalyst                                          | T<br>(°C) | CH <sub>4</sub><br>(MPa) | H <sub>2</sub> O <sub>2</sub><br>(M) | t<br>h     | C1 oxygenates |                                                                | Reference                                                   |
|---------------------------------------------------|-----------|--------------------------|--------------------------------------|------------|---------------|----------------------------------------------------------------|-------------------------------------------------------------|
|                                                   |           |                          |                                      |            | Sel.<br>(%)   | Yield<br>( $\mu\text{mol g}_{\text{cat}}^{-1} \text{h}^{-1}$ ) |                                                             |
| TiO <sub>2</sub>                                  | 50        | 3.05                     | 0.5                                  | 0.5        | 0             | 0                                                              | <i>ACS Catal.</i> , 2018, <b>8</b> , 2567-2576.             |
| TiO <sub>2</sub>                                  | light     | 0.1                      | hence                                | 3          | ~60           | ~90                                                            | <i>Nat. Catal.</i> , 2018, <b>1</b> , 889–896               |
| g-C <sub>3</sub> N <sub>4</sub>                   | 35        | 3                        | 0.05                                 | 2          | -             | 140                                                            | <i>Int. J. Energy Res.</i> , 2020, <b>44</b> , 2740-2753    |
| Cr <sub>2</sub> O <sub>3</sub>                    | 50        | 3                        | 0.5                                  | 1          | -             | 260                                                            | <i>Angew. Chem. Int. Ed.</i> , 2020, <b>59</b> , 1216-1219  |
| Fe <sub>2</sub> O <sub>3</sub>                    | 50        | 3                        | 0.3                                  | 1          | 77.6          | 273.6                                                          | <i>Angew. Chem. Int. Ed.</i> , 2021, <b>60</b> , 5811-5815  |
| FeO                                               | 50        | 3                        | 0.3                                  | 1          | 0             | 0                                                              | <i>Angew. Chem. Int. Ed.</i> , 2021, <b>60</b> , 5811-5815  |
| ZrO <sub>2</sub>                                  | 70        | 3                        | 0.5                                  | 0.5        | 0             | 0                                                              | <i>J. Am. Chem. Soc.</i> , 2017, <b>139</b> , 17694–17699   |
| 0.3Rh <sub>1</sub> /ZrO <sub>2</sub>              | 70        | 3                        | 0.5                                  | 0.5        | 78            | 76.7                                                           | <i>J. Am. Chem. Soc.</i> , 2017, <b>139</b> , 17694–17699   |
| 5AuPd/TiO <sub>2</sub>                            | 50        | 3.05                     | 0.5                                  | 0.5        | 90.3          | 247.1                                                          | <i>Angew. Chem. Int. Ed.</i> , 2013, <b>52</b> , 1280-1284  |
| 2.7 Fe <sub>1</sub> N <sub>4</sub> /GN            | r.t.      | 2                        | 5                                    | 10         | 94            | 230                                                            | <i>Chem</i> , 2018, <b>4</b> , 1902-1910                    |
| FeO <sub>x</sub> /TiO <sub>2</sub>                | light     | 0.1                      | hence                                | 3          | ~60           | ~323.6                                                         | <i>Nat. Catal.</i> , 2018, <b>1</b> , 889–896               |
| FeOOH/m-WO <sub>3</sub>                           | light     | 0.1                      | hence                                | 4          | 91            | 211.2                                                          | <i>Fuel</i> , 2020, <b>266</b> , 117104                     |
| FeOOH/Li <sub>0.1</sub> WO <sub>3</sub>           | light     | 2                        | 0.1                                  | 4          | -             | ~106.5                                                         | <i>Environ. Sci. Technol.</i> , 2021, <b>55</b> , 7711-7720 |
| 0.2Cu <sub>1</sub> /C <sub>3</sub> N <sub>4</sub> | r.t.      | 3                        | 4                                    | 5          | 95            | 166.7                                                          | <i>Chem. Comm.</i> , 2020, <b>56</b> , 14677-14680          |
| 2.5Cu/ZSM-5(50)                                   | 50        | 3                        | 0.5                                  | 0.5        | 27            | 10.4                                                           | <i>ChemPhysChem</i> , 2017, <b>19</b> , 469-478             |
| Pd <sub>1</sub> /2DT                              | light     | 2                        | 0.1                                  | 4          | -             | 46.3                                                           | <i>ACS Catal.</i> , 2021, <b>11</b> , 14038-14046           |
| <b>UiO-66-H</b>                                   | <b>50</b> | <b>3</b>                 | <b>0.25</b>                          | <b>0.5</b> | <b>~100</b>   | <b>364.0</b>                                                   | <b>This work</b>                                            |

## References:

- 1 V. Wang, N. Xu, J.-C. Liu, G. Tang and W.-T. Geng, *Comput. Phys. Commun.*, 2021, **267**, 108033.
- 2 Z. Jin, L. Wang, E. Zuidema, K. Mondal, M. Zhang, J. Zhang, C. Wang, X. Meng, H. Yang, C. Mesters and F.-S. Xiao, *Science*, 2020, **367**, 193–197.
- 3 T. Yu, Z. Li, L. Lin, S. Chu, Y. Su, W. Song, A. Wang, B. M. Weckhuysen and W. Luo, *ACS Catal.*, 2021, **11**, 6684-6691.
- 4 N. Agarwal, S. J. Freakley, R. U. McVicker, S. M. Althahban, N. Dimitratos, Q. He, D. J. Morgan, R. L. Jenkins, D. J. Willock, S. H. Taylor, C. J. Kiely and G. J. Hutchings, *Science*, 2017, **358**, 223–227.
